# Supplementary material for: Automatic Identification of Myeloperoxidase Natural Inhibitors in Plant Extracts
Source: MDPI journal article supplement (doi:10.3390/molecules27061825), 2022-03-11
Supplement: s1 [file s1]

## Supplementary material

**Table S1.** Different conditions tested and optimization results of the SIA system developed.

| Parameter                                        | Range                                                 | Selected value                                       |
|--------------------------------------------------|-------------------------------------------------------|------------------------------------------------------|
| pH                                               | 6; 7.4; 8                                             | 7.4                                                  |
| MPO                                              | Concentration                                         | 0.30 U/mL; 0.40 U/mL; 0.60 U/mL                      |
|                                                  | Volume                                                | 10 $\mu$ L; 30 $\mu$ L; 50 $\mu$ L                   |
| ADHP                                             | Concentration                                         | 10 $\mu$ M; 20 $\mu$ M; 40 $\mu$ M                   |
|                                                  | Volume                                                | 10 $\mu$ L; 20 $\mu$ L; 30 $\mu$ L; 40 $\mu$ L       |
| H <sub>2</sub> O <sub>2</sub>                    | Concentration                                         | 9.8 mM- 0.26 mM                                      |
|                                                  | Volume                                                | 10 $\mu$ L; 30 $\mu$ L                               |
| Division and order of aspiration of the aliquots | H <sub>2</sub> O <sub>2</sub> -ADHP-buffer-enzyme (◆) | ADHP-buffer-enzyme-H <sub>2</sub> O <sub>2</sub> (×) |
|                                                  | H <sub>2</sub> O <sub>2</sub> -buffer-enzyme-ADHP (■) |                                                      |
|                                                  | ADHP-H <sub>2</sub> O <sub>2</sub> -buffer-enzyme (▲) |                                                      |
|                                                  | ADHP-buffer-enzyme-H <sub>2</sub> O <sub>2</sub> (×)  |                                                      |
| Propulsion time to the reactor                   | 15; 20; 30 seconds                                    | 20 seconds                                           |
| Stopped flow period                              | 1; 3; 5 minute                                        | 5 minutes                                            |

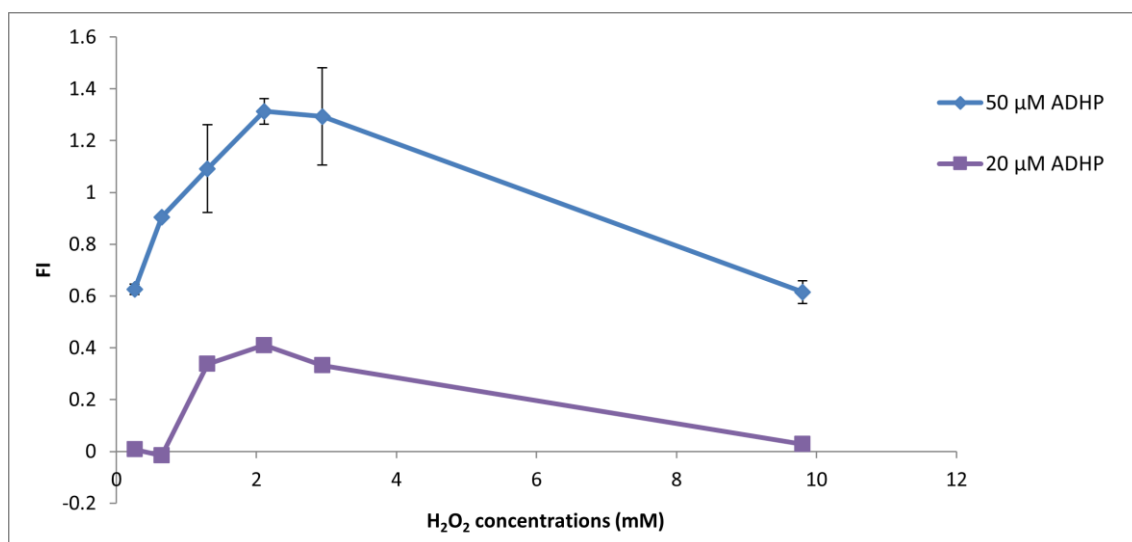

**Figure S1.** Influence of H<sub>2</sub>O<sub>2</sub> concentration on the analytical signal of the enzymatic reaction.

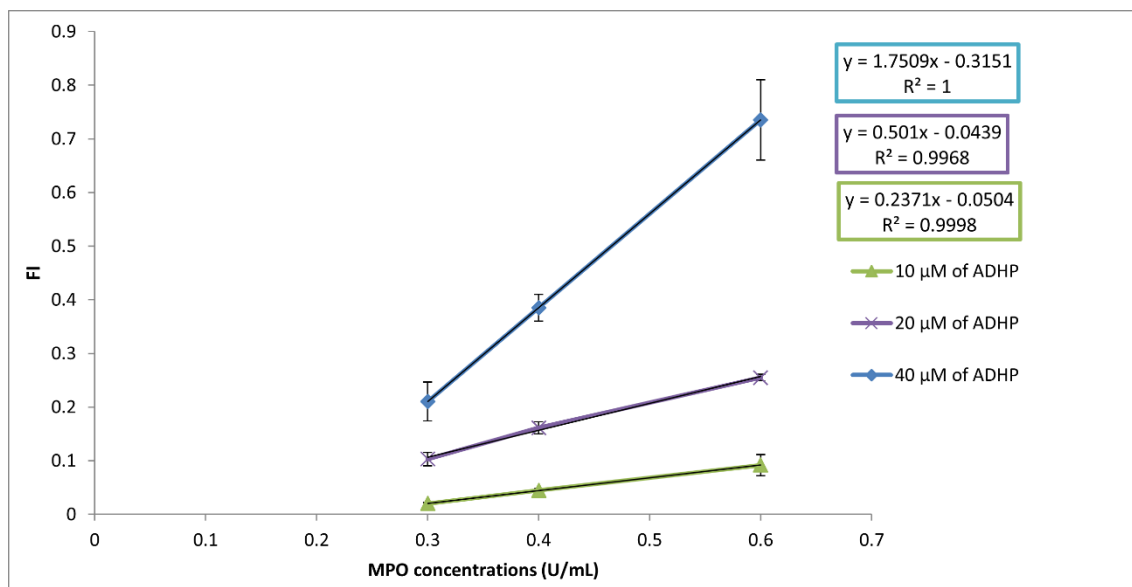

**Figure S2.** Influence of MPO and ADHP concentration on the analytical signal of the enzymatic reaction.

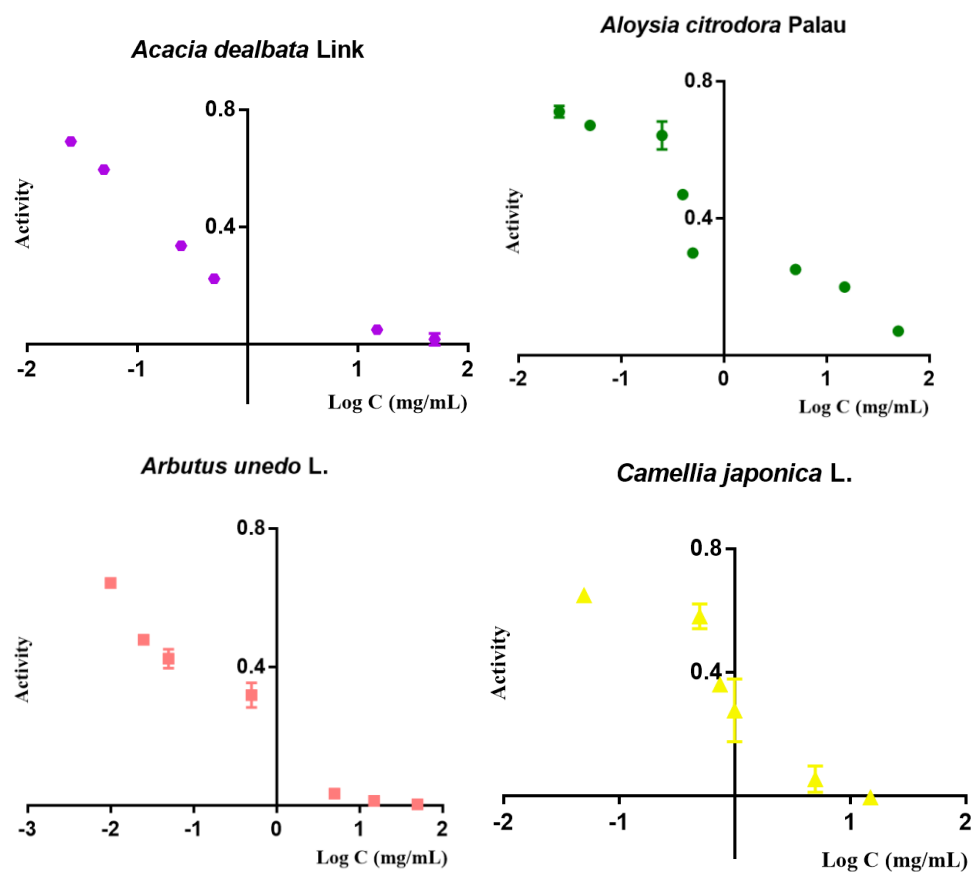

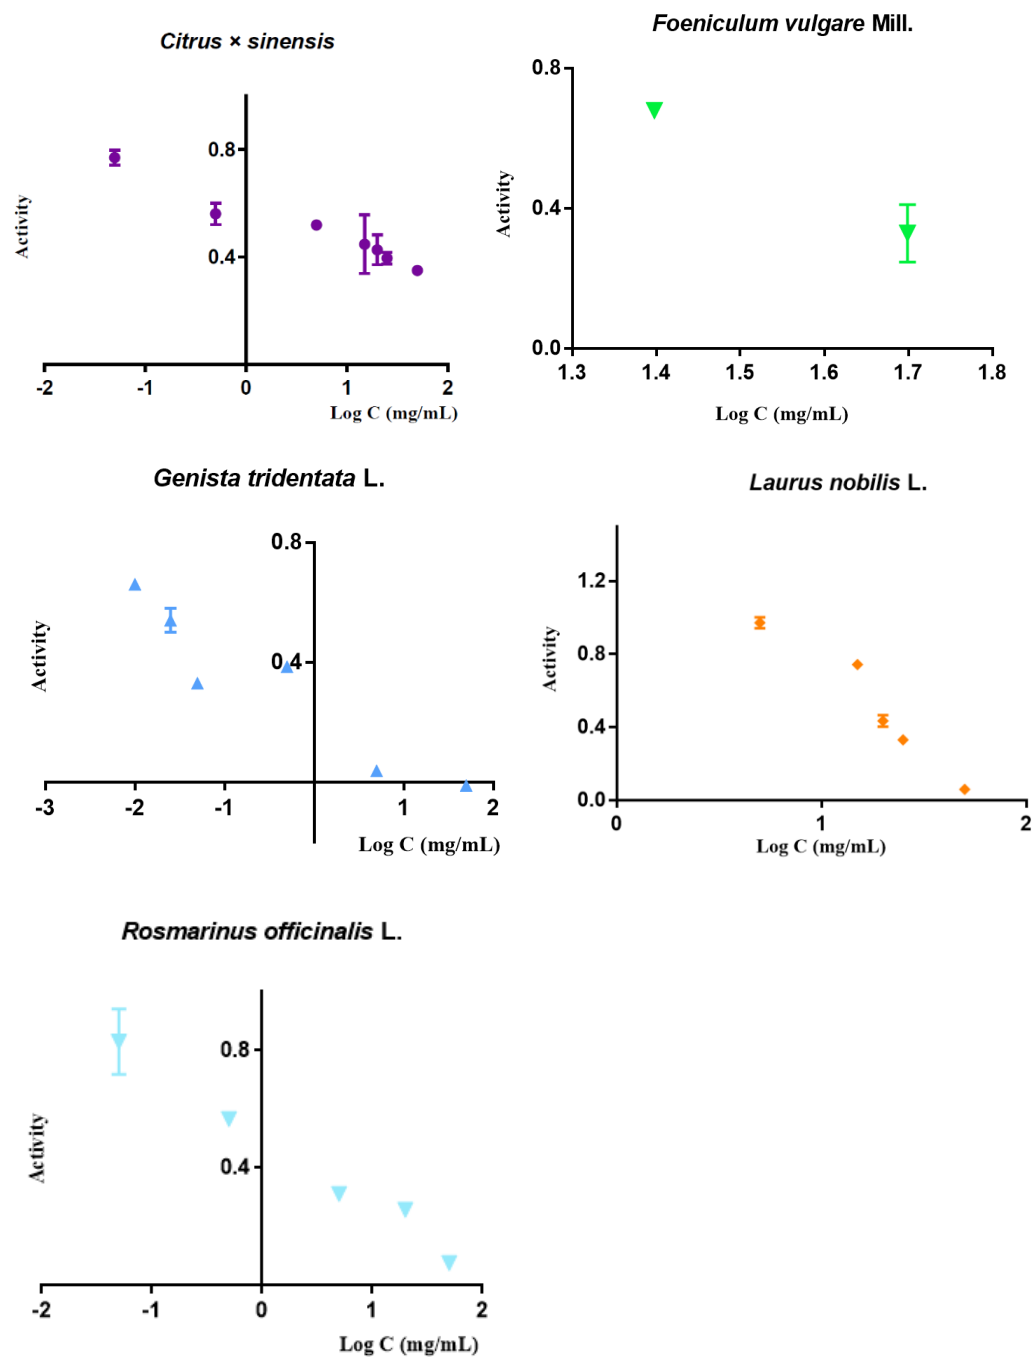

**Figure S3.** Experimental inhibition data of the plant extracts tested in the MPO inhibition assays in SIA.

**Table S2.** Analytical cycle developed and optimized in the SIA system.

| Step | Position Valve | In/Out | Number of steps | Time (s) | Event                       |
|------|----------------|--------|-----------------|----------|-----------------------------|
| 3    | 2              | Out    | -320            | 2.4      | Aspiration of ADHP          |
| 4    | 4              | Out    | -80             | 1.2      | Aspiration of buffer/sample |
| 5    | 6              | Out    | -240            | 1.8      | Aspiration of enzyme        |

|   |   |     |       |     |                                                               |
|---|---|-----|-------|-----|---------------------------------------------------------------|
| 6 | 3 | Out | -80   | 1.2 | Aspiration of<br>H <sub>2</sub> O <sub>2</sub>                |
| 7 | 5 | Out | 2670  | 20  | Propulsion to<br>the reaction<br>tube                         |
| 8 | 5 | Out | 0     | 300 | 5 minutes of<br>stopped flow<br>in the thermo-<br>static bath |
| 9 | 5 | Out | 18500 | 139 | Propulsion to<br>the detector                                 |

---
